# Supplementary material for: Facile synthesis of water soluble silver ferrite (AgFeO2) nanoparticles and their biological application as antibacterial agents
Source: Royal Society of Chemistry journal article supplement (doi:10.1039/c4ra14461a), 2015-01-01
Supplement: c4ra14461a1.pdf [file c4ra14461a1.pdf]

## Supporting file

### **Facile synthesis of water soluble silver ferrite ( $\text{AgFeO}_2$ ) nanoparticles and biological application as antibacterial agents**

**Hani Nasser Abdelhamid**<sup>1,2</sup>, **Abuo Talib**,<sup>5</sup> **Hui-Fen Wu**<sup>1,3,4,5\*</sup>

<sup>1</sup>Department of Chemistry, National Sun Yat-Sen University, Kaohsiung, 804, Taiwan

<sup>2</sup>Department of Chemistry, Assuit University, Assuit, 71515, Egypt

<sup>3</sup>School of Pharmacy, College of Pharmacy, Kaohsiung Medical University, Kaohsiung, 800, Taiwan

<sup>4</sup>Center for Nanoscience and Nanotechnology, National Sun Yat-Sen University, Kaohsiung, 804, Taiwan

<sup>5</sup>Doctoral Degree Program in Marine Biotechnology, National Sun Yat-Sen University, Kaohsiung, 804, Taiwan

\*Corresponding author. Tel: 886-7-5252000-3955. Fax: 886-7-525-3908.

E-mail: [hwu@faculty.nsysu.edu.tw](mailto:hwu@faculty.nsysu.edu.tw) (Prof. Hui-Fen Wu)

## Figure Captions

**Fig.S1.** Size distribution of AgFeO<sub>2</sub> NPs.

**Fig.S2.** EDX analysis of AgFeO<sub>2</sub>@PEG NPs

**Fig.S3.** MALDI-MS profile of *S. aureus* upon addition of (A) AgFeO<sub>2</sub> and (B) AgFeO<sub>2</sub>@PEG upon different amount (a) 0, (b) 25, (c) 50, (d) 75 and (e) 100 µg/mL.

**Fig.S1**



**a**

**A**

**b**

**c**

**d**

**e**

**a**

**B**

**b**

**c**

**d**

**e**

**Abundance**
